# Supplementary material for: Burden of neck pain in general population of China, 1990–2019: An analysis for the Global Burden of Disease Study 2019
Source: PubMed Central journal article supplement (PMC10994671; doi:10.7189/jogh.14.04066), 2024-04-05
Supplement: jogh-14-04066-s001.pdf [file jogh-14-04066-s001.pdf]

Supplementary Figure 1 Age standardized incidence (per 100 000 population) and number of incident cases of females and males in China from 1990 to 2019. Dotted lines indicate 95% upper and lower uncertainty intervals.

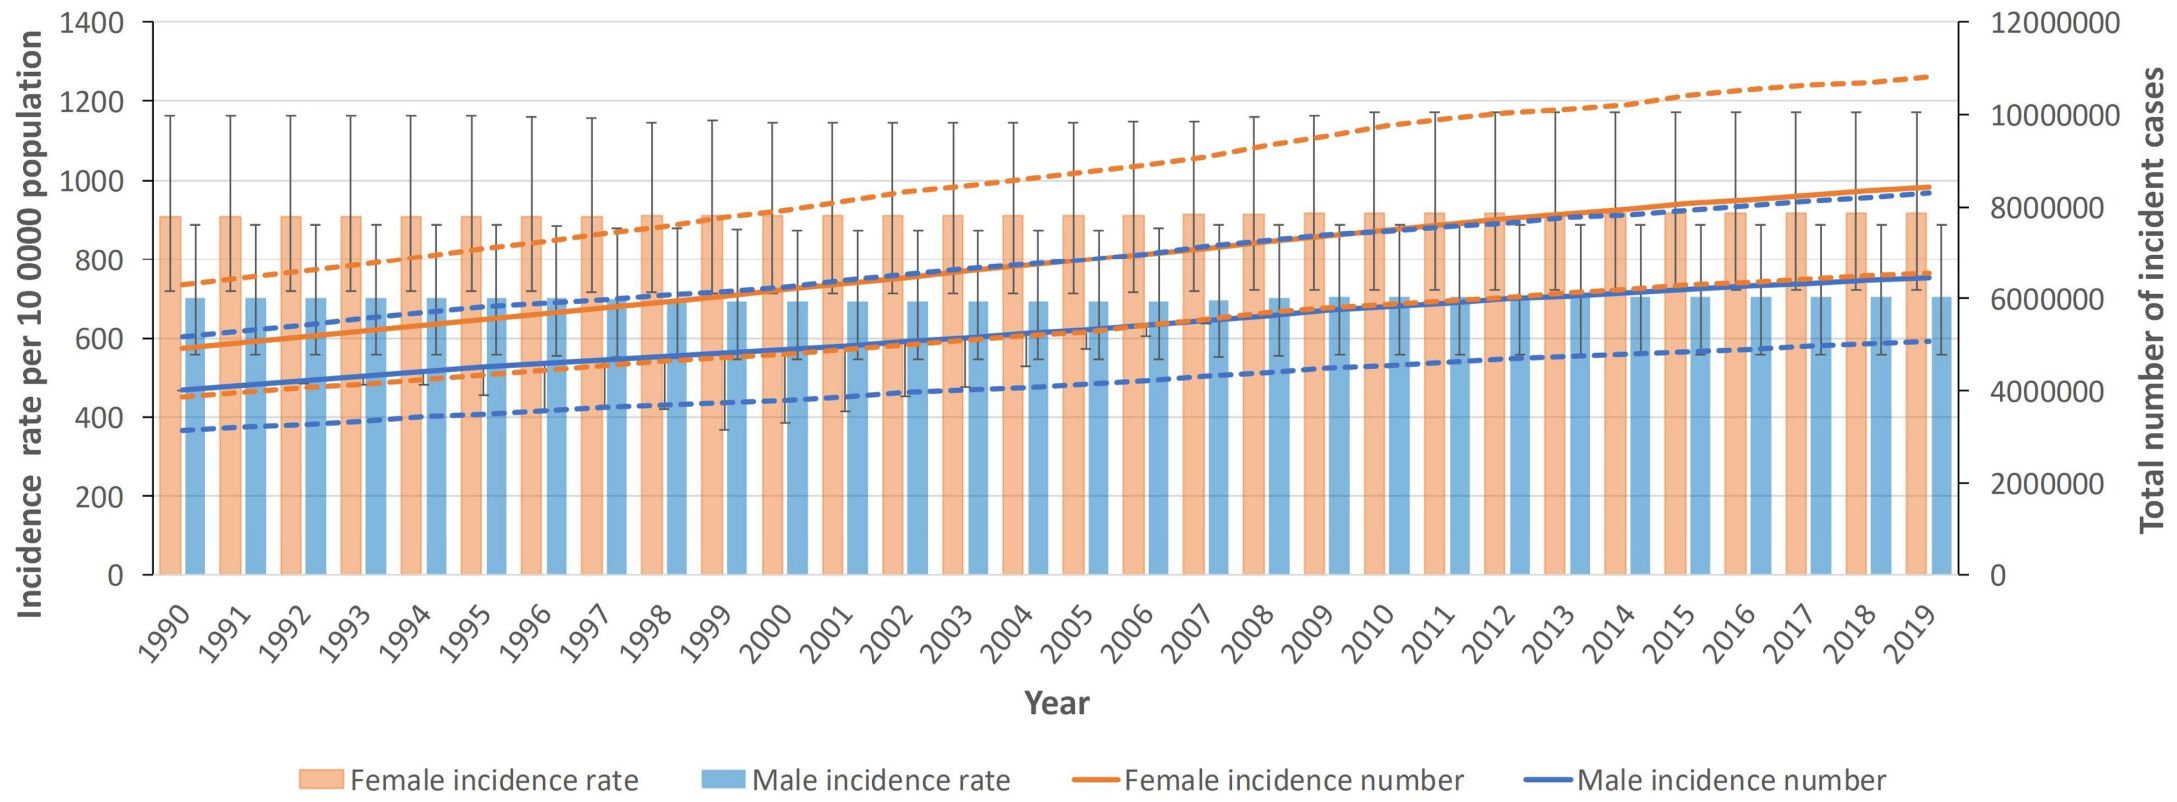

Supplementary Figure 2 Age-standardized incidence (per 100 000 population) and number of incident cases by age and sex in 1990 and 2019. Dotted lines indicate 95% upper and lower uncertainty intervals. A:1990; B:2019.

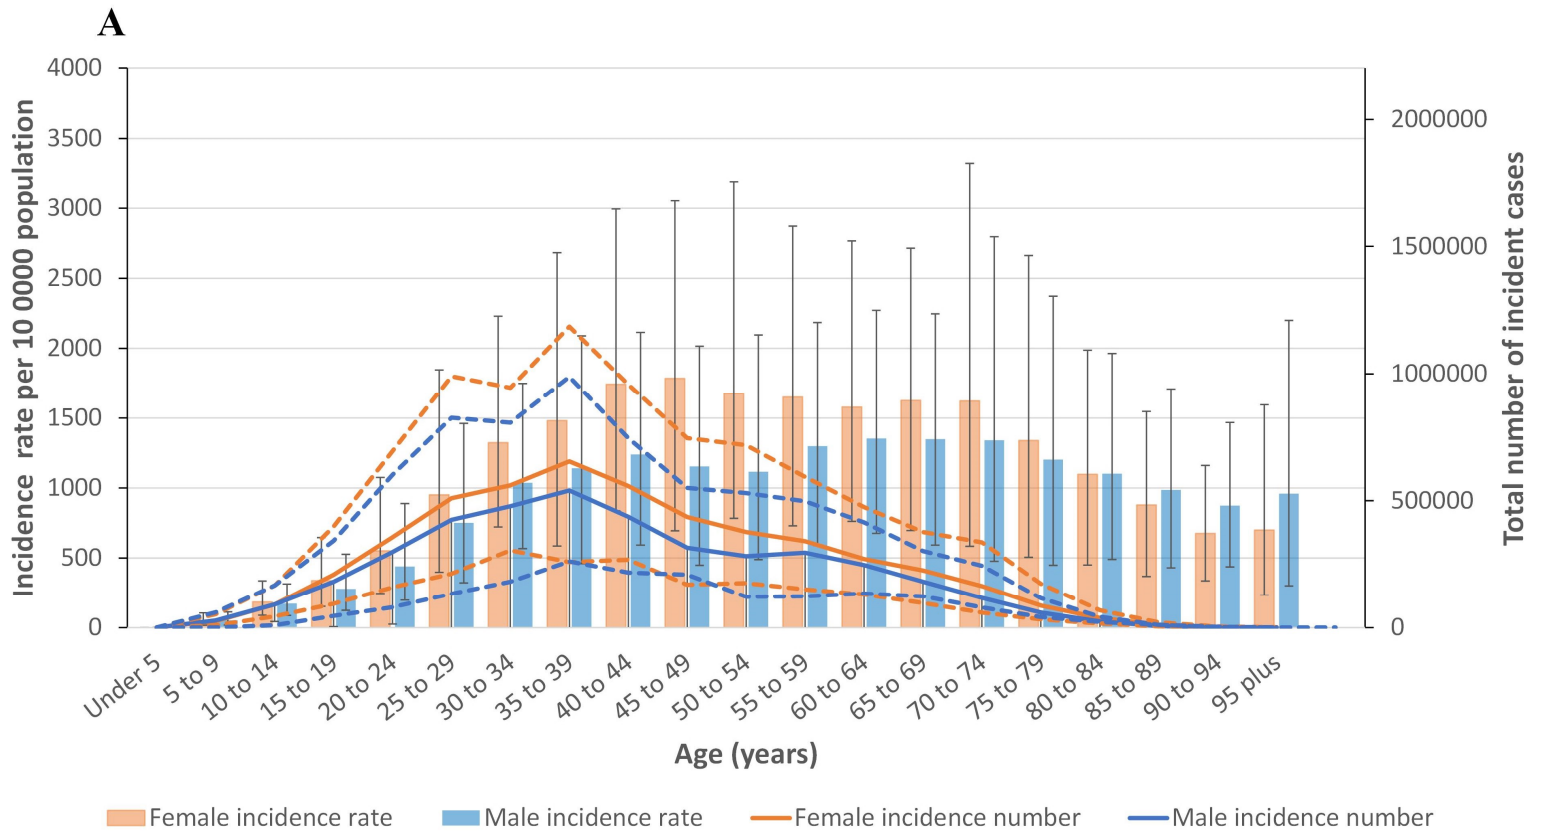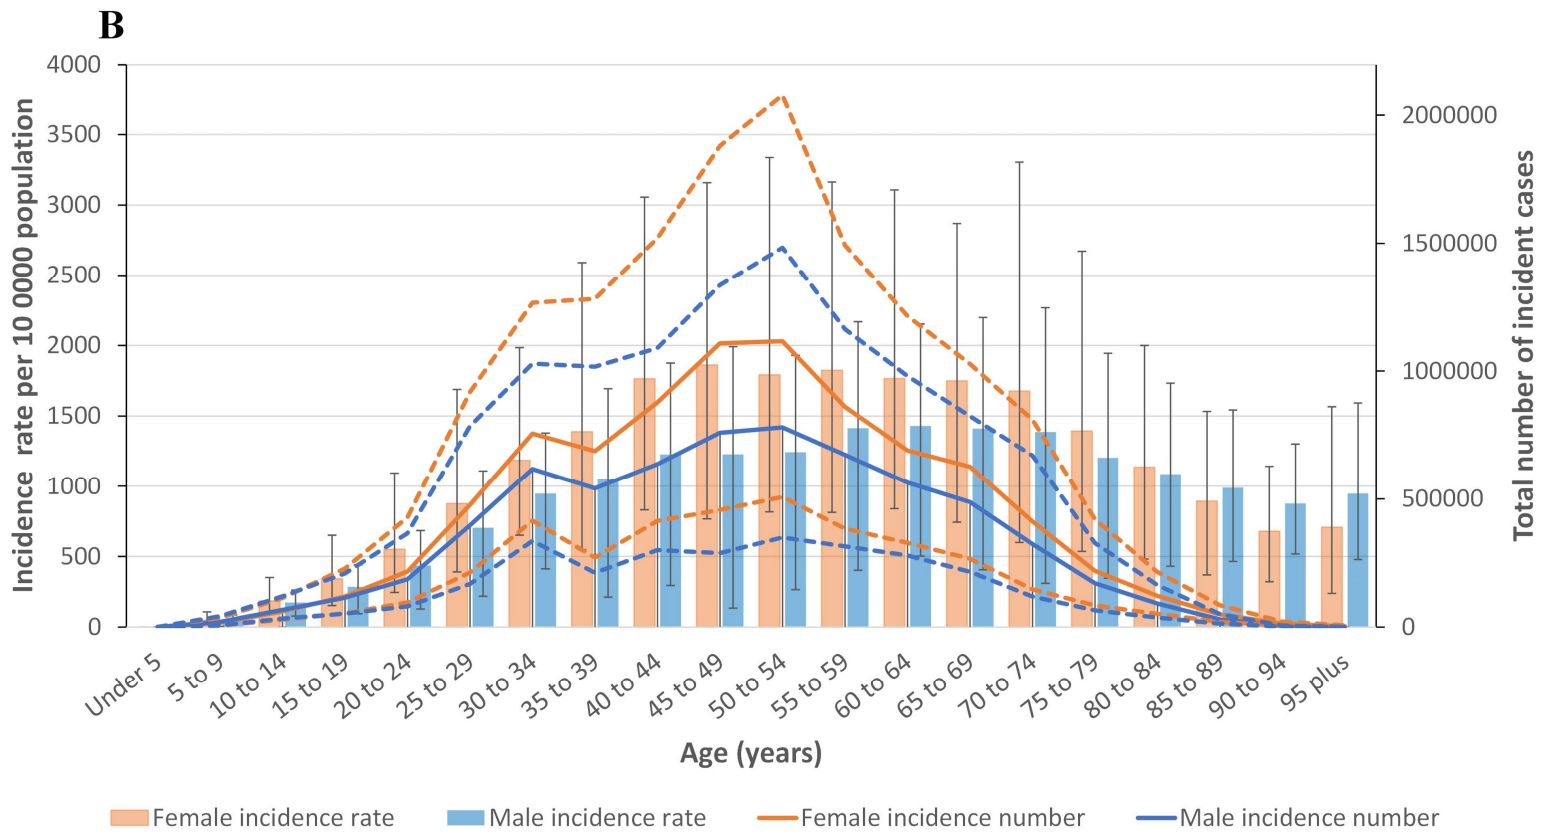

Supplementary Figure 3 Age standardized years lived with disability (YLD) rate (per 100 000 population) and number of YLDs of females and males in China from 1990 to 2019. Dotted lines indicate 95% upper and lower uncertainty intervals.

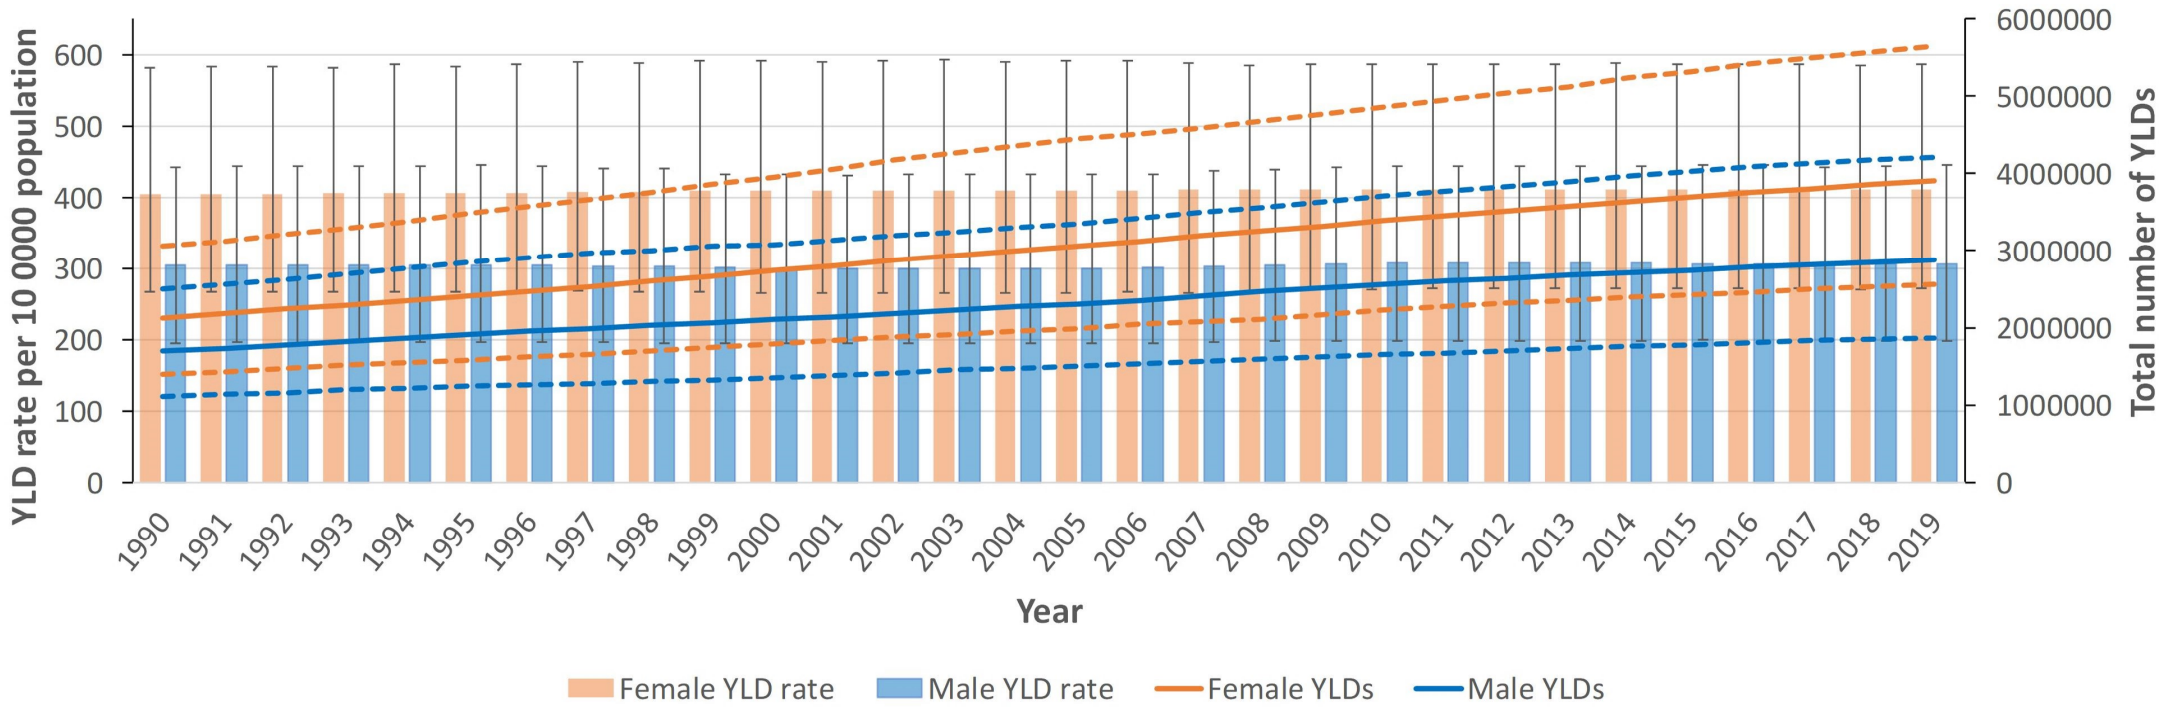







Supplementary Figure 5 Sociodemographic index (SDI) of 33 provinces/municipalities/autonomous regions in China in 1990 and 2019, and the changes between 1990 and 2019.

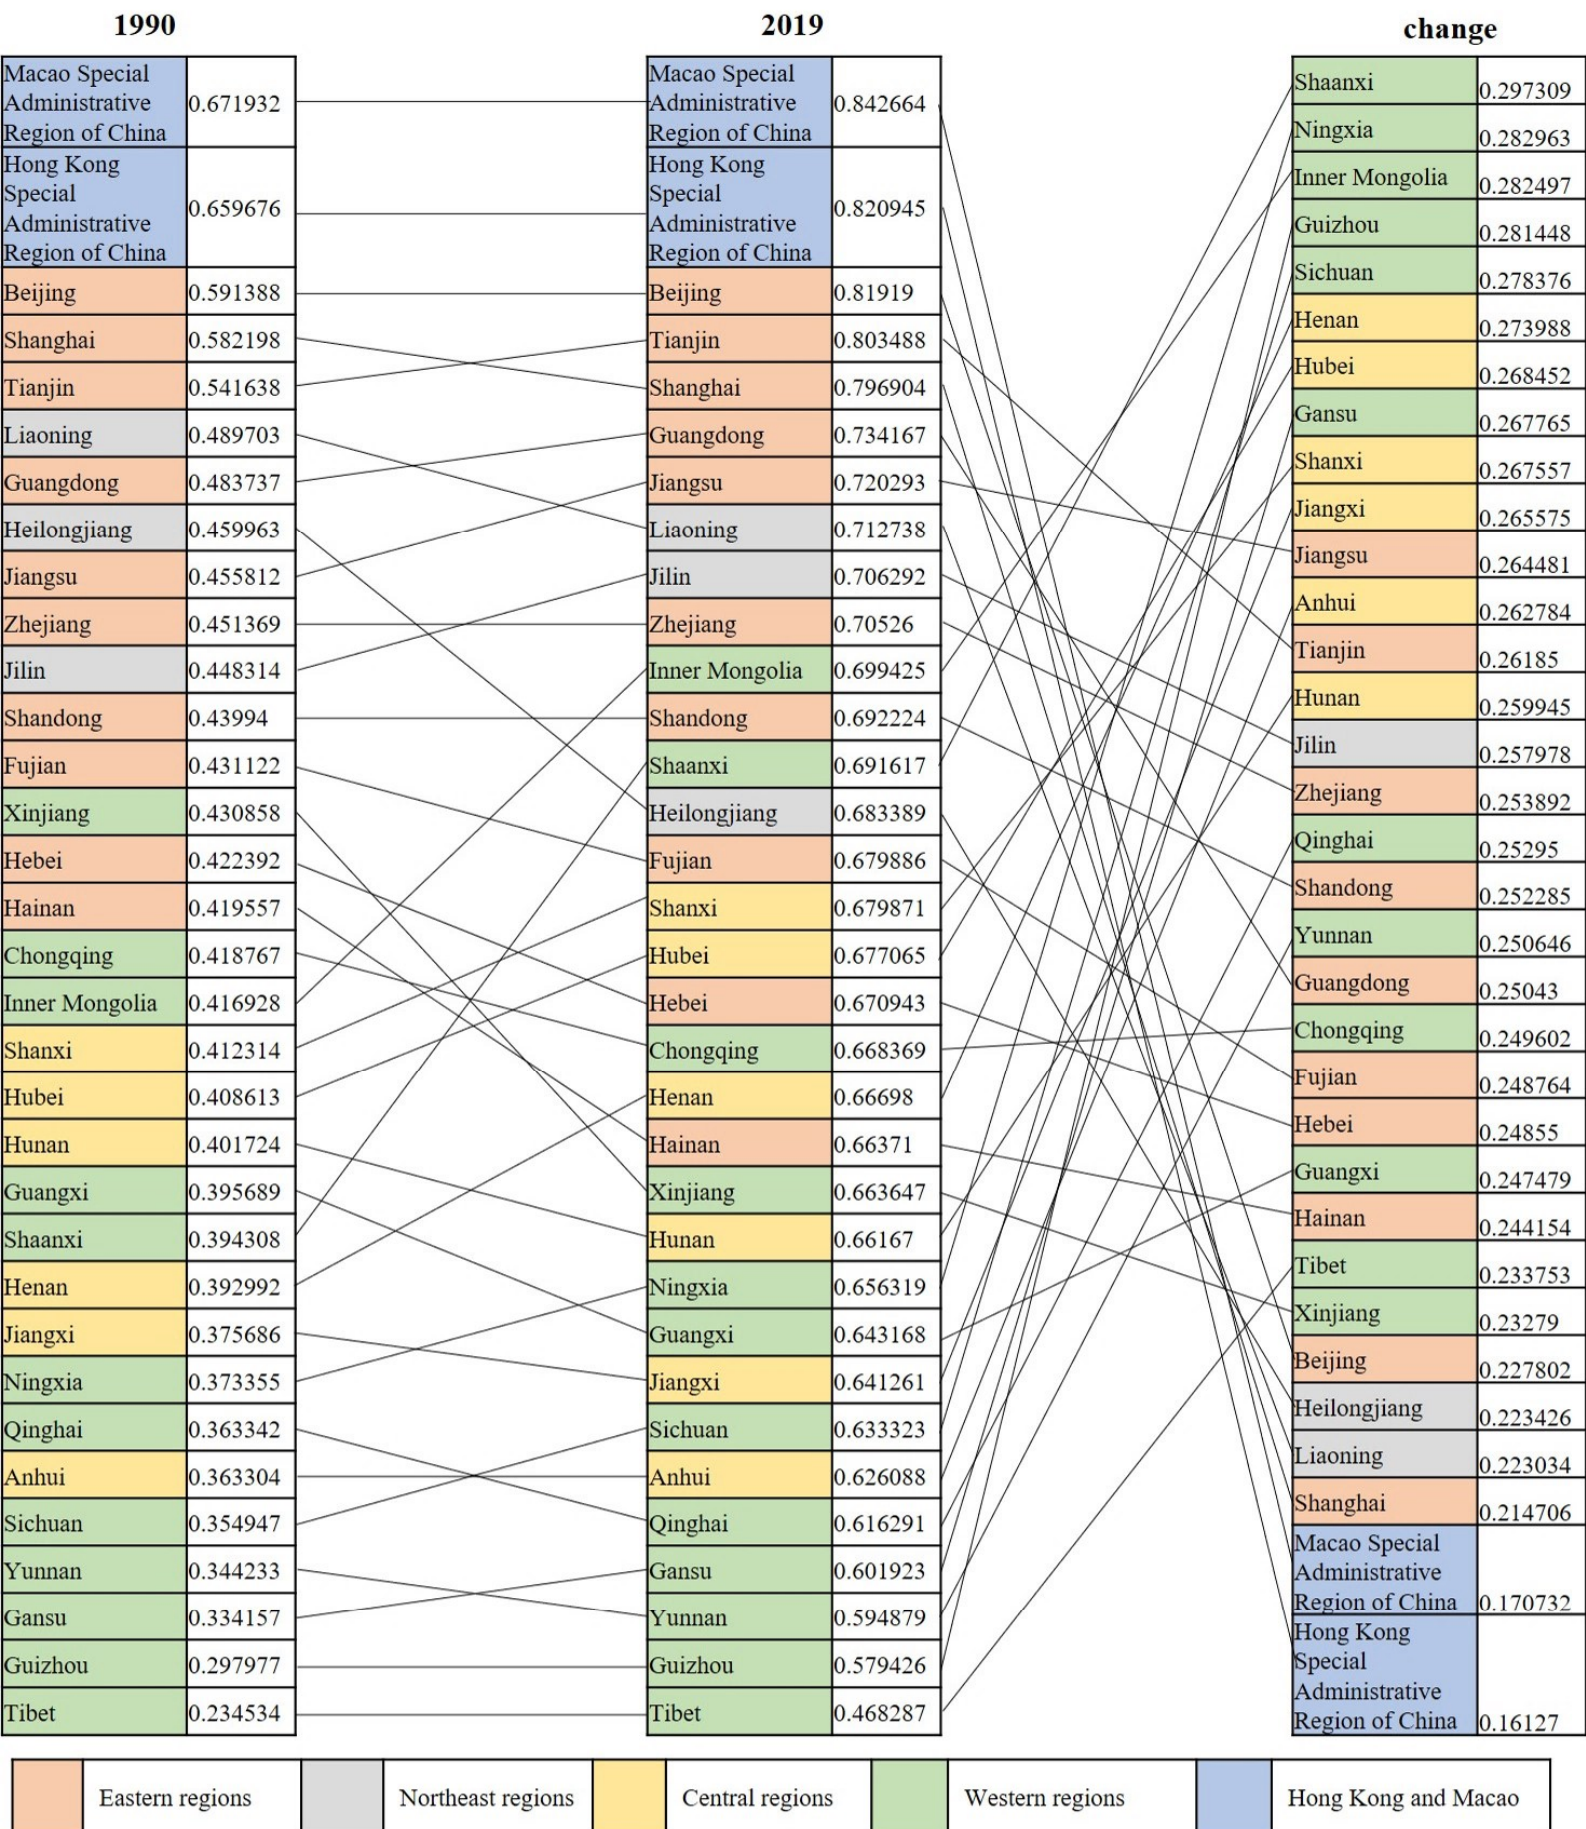

**Supplementary table 1**

**Age-standardized incidence, prevalence and YLD rate and their changes of neck pain in 27 countries, 1990 and 2019.**

| Country name     | Incidence<br>(per 100000 population) |                            | Change (%)              | Prevalence<br>(per 100000 population) |                               | Change (%)              | YLDs rate<br>(per 100000 population) |                            | Change (%)             |
|------------------|--------------------------------------|----------------------------|-------------------------|---------------------------------------|-------------------------------|-------------------------|--------------------------------------|----------------------------|------------------------|
|                  | 1990                                 | 2019                       |                         | 1990                                  | 2019                          |                         | 1990                                 | 2019                       |                        |
| <b>Global</b>    | 581.74<br>(460.94,737.68)            | 579.09<br>(457.90,729.6)   | -0.46<br>(-2.13,1.52)   | 2709.42<br>(2172.31,3409.76)          | 2696.52<br>(2177.01,3375.19)  | -0.48<br>(-2.58,1.67)   | 268.26<br>(176.71,382.67)            | 267.35<br>(175.53,383.54)  | -0.34<br>(-2.13,1.52)  |
| <b>Argentina</b> | 396.75<br>(310.24,501.29)            | 396.82<br>(310.34,501.40)  | 0.02<br>(-0.03,0.05)    | 1933.69<br>(1539.03, 2447.46)         | 1934.02<br>(1539.41,2447.84)  | 0.02<br>(-0.02,0.05)    | 192.43<br>(125.73, 274.56)           | 192.24<br>(126.84, 273.44) | -0.10<br>(-2.92, 2.94) |
| <b>Australia</b> | 246.10<br>(194.93, 307.43)           | 246.19<br>(194.93,307.68)  | 0.04<br>(-0.10,0.14)    | 1092.58<br>(862.77, 1384.65)          | 1092.71<br>(861.18, 1386.04)  | 0.01<br>(-0.19,0.16)    | 107.88<br>(70.51, 154.18)            | 107.86<br>(70.81, 155.14)  | -0.02<br>(-4.03,4.19)  |
| <b>Brazil</b>    | 506.19<br>(396.80, 645.79)           | 503.83<br>(395.14,641.96)  | -0.47<br>(-0.70, -0.26) | 2250.15<br>(1775.99, 2883.49)         | 2241.89<br>(1770.55, 2870.64) | -0.37<br>(-0.63, -0.15) | 221.32<br>(145.14, 321.67)           | 221.72<br>(145.36, 322.57) | 0.18<br>(-0.88,1.22)   |
| <b>Burundi</b>   | 269.06<br>(209.48, 341.49)           | 266.91<br>(208.08,338.81)  | -0.80<br>(-1.21, -0.51) | 1154.23<br>(911.07, 1474.25)          | 1141.83<br>(900.81, 1458.66)  | -1.07<br>(-1.64, -0.56) | 113.91<br>(74.87, 164.49)            | 112.61<br>(73.96, 162.06)  | -1.14<br>(-4.67,2.83)  |
| <b>Canada</b>    | 533.86<br>(419.09, 675.80)           | 534.31<br>(419.47,676.66)  | 0.08<br>(0.005, 0.16)   | 2942.54<br>(2327.50, 3729.95)         | 2942.27<br>(2325.80, 3731.63) | -0.01<br>(-0.16,0.12)   | 292.87<br>(192.28, 423.36)           | 292.18<br>(191.39, 419.70) | -0.24<br>(-2.57,2.05)  |
| <b>China</b>     | 800.68<br>(634.43, 1016.63)          | 809.91<br>(641.89,1028.61) | 1.15<br>(-2.46,5.09)    | 3528.35<br>(2800.49, 4485.74)         | 3571.96<br>(2868.20, 4517.63) | 1.24<br>(-4.53,7.02)    | 352.84<br>(230.02, 516.83)           | 358.13<br>(234.54, 515.95) | 1.50<br>(-4.27,7.29)   |
| <b>Denmark</b>   | 696.29<br>(547.19, 881.35)           | 696.26<br>(547.27, 881.31) | -0.005<br>(-0.10,0.06)  | 4486.91<br>(3581.42, 5617.87)         | 4477.65<br>(3571.18, 5607.69) | -0.21<br>(-0.36, -0.08) | 446.90<br>(299.25, 645.48)           | 446.46<br>(298.43, 647.40) | -0.10<br>(-2.10,2.01)  |
| <b>Djibouti</b>  | 266.49<br>(208.01, 338.40)           | 266.41<br>(207.64, 338.33) | -0.03<br>(-0.27,0.23)   | 1141.07<br>(899.44, 1457.80)          | 1138.49<br>(898.08, 1454.09)  | -0.23<br>(-0.50,0.03)   | 113.49<br>(75.62, 163.24)            | 113.31<br>(74.08, 162.39)  | -0.15<br>(-4.10,3.75)  |
| <b>Eritrea</b>   | 269.19<br>(209.79, 341.71)           | 268.39<br>(209.33, 340.77) | -0.30<br>(-0.45, -0.19) | 1156.28<br>(912.04, 1475.57)          | 1152.68<br>(909.12, 1471.25)  | -0.31<br>(-0.47, -0.15) | 113.50<br>(75.40, 163.75)            | 113.67<br>(74.48, 164.21)  | 0.16<br>(-3.74,4.10)   |
| <b>Finland</b>   | 670.70<br>(530.65, 856.04)           | 671.89<br>(530.58, 849.84) | 0.18<br>(-3.88,5.25)    | 4323.11<br>(3514.07, 5377.42)         | 4305.96<br>(3419.79, 5365.80) | -0.40<br>(-6.71,6.14)   | 429.80<br>(290.19, 628.45)           | 428.80<br>(288.49, 611.15) | -0.23<br>(-7.06,6.39)  |
| <b>France</b>    | 507.18                               | 507.58                     | 0.08                    | 2793.95                               | 2792.68                       | -0.05                   | 278.95                               | 279.23                     | 0.10                   |

|                           |                             |                             |                           |                               |                               |                            |                            |                            |                            |
|---------------------------|-----------------------------|-----------------------------|---------------------------|-------------------------------|-------------------------------|----------------------------|----------------------------|----------------------------|----------------------------|
|                           | (398.25, 634.25)            | (398.72, 635.32)            | (-0.02,0.17)              | (2252.49, 3530.98)            | (2250.97, 3529.56)            | (-0.19, 0.07)              | (187.04, 405.92)           | (185.91, 406.67)           | (-2.39, 2.67)              |
| <b>Germany</b>            | 595.98<br>(467.90, 754.96)  | 594.75<br>(466.76, 753.91)  | -0.21<br>(-0.43, -0.04)   | 3576.05<br>(2851.89,4522.22)  | 3552.80<br>(2833.46 4497.03)  | -0.65<br>(-1.00, -0.34)    | 356.53<br>(233.19, 518.59) | 353.80<br>(234.96, 510.13) | -0.77<br>(-3.00, 1.64)     |
| <b>India</b>              | 391.37<br>(305.81, 492.84)  | 392.03<br>(306.34, 493.29)  | 0.17<br>(0.07,0.26)       | 1651.79<br>(1322.59, 2090.93) | 1655.50<br>(1326.30, 2094.80) | 0.22<br>(0.07, 0.42)       | 160.57<br>(107.10, 230.62) | 161.95<br>(107.99, 234.14) | 0.86<br>(0.15, 1.58)       |
| <b>Indonesia</b>          | 965.78<br>(764.37, 1220.30) | 965.00<br>(763.65, 1218.88) | -0.08<br>(-0.14, -0.02)   | 4306.84<br>(3413.65, 5479.71) | 4302.58<br>(3410.29, 5473.63) | -0.10<br>(-0.18, 0.02)     | 426.01<br>(279.88, 613.84) | 427.53<br>(280.32, 613.71) | 0.36<br>(-0.40, 1.08)      |
| <b>Italy</b>              | 774.85<br>(612.82, 975.97)  | 773.46<br>(611.97, 973.96)  | -0.18<br>(-0.26, -0.11)   | 3861.70<br>(3087.74, 4893.29) | 3848.98<br>(3080.42, 4874.44) | -0.33<br>(-0.47, -0.21)    | 383.70<br>(253.57, 545.79) | 384.17<br>(254.24, 546.39) | 0.12<br>(-0.60, 0.85)      |
| <b>Japan</b>              | 443.92<br>(348.96, 564.14)  | 442.76<br>(348.05, 562.75)  | -0.26<br>(-0.40, -0.17)   | 1962.85<br>(1550.85, 2486.90) | 1954.59<br>(1544.42, 2477.85) | -0.42<br>(-0.62, -0.26)    | 195.82<br>(129.34, 286.66) | 195.78<br>(129.81, 287.92) | -0.02<br>(-0.78, 0.65)     |
| <b>Mexico</b>             | 376.96<br>(296.66, 479.95)  | 377.28<br>(296.90, 480.24)  | 0.08<br>(0.03, 0.14)      | 1594.04<br>(1257.94, 2056.60) | 1595.89<br>(1258.92, 2058.85) | 0.12<br>(0.04, 0.20)       | 157.47<br>(104.76, 227.83) | 157.83<br>(104.51, 229.16) | 0.23<br>(-0.63, 1.09)      |
| <b>Norway</b>             | 658.78<br>(523.61, 833.31)  | 576.71<br>(453.67, 723.40)  | -12.46<br>(-15.79, -8.30) | 3238.82<br>(2571.94, 4127.02) | 2659.99<br>(2099.64, 3366.72) | -17.87<br>(-23.67, -11.22) | 321.32<br>(212.51, 465.85) | 265.20<br>(174.84, 380.08) | -17.47<br>(-23.22, -10.99) |
| <b>Republic of Korea</b>  | 358.31<br>(280.32, 460.26)  | 356.64<br>(279.43, 458.59)  | -0.47<br>(-0.66, -0.29)   | 1735.86<br>(1372.76, 2219.94) | 1719.45<br>(1361.87, 2196.17) | -0.95<br>(-1.26, -0.59)    | 172.29<br>(113.62, 247.81) | 171.97<br>(112.56, 247.48) | -0.19<br>(-3.33, 3.02)     |
| <b>Russian Federation</b> | 394.24<br>(308.15, 496.01)  | 393.79<br>(307.75, 495.45)  | -0.11<br>(-0.25, -0.01)   | 1668.46<br>(1338.79, 2108.28) | 1665.48<br>(1335.94, 2103.82) | -0.18<br>(-0.36, -0.03)    | 164.23<br>(108.73, 237.34) | 164.90<br>(109.57, 238.37) | 0.41<br>(-0.45, 1.26)      |
| <b>Saudi Arabia</b>       | 578.70<br>(454.97, 738.43)  | 580.19<br>(455.89, 741.83)  | 0.26<br>(-0.06, 0.47)     | 2724.05<br>(2144.74, 3458.40) | 2727.84<br>(2143.30, 3464.93) | 0.14<br>(-0.18, 0.41)      | 269.06<br>(178.15, 389.13) | 268.59<br>(178.87, 389.36) | -0.18<br>(-2.70, 2.42)     |
| <b>South Africa</b>       | 323.08<br>(255.49, 410.96)  | 322.82<br>(255.27, 410.36)  | -0.08<br>(-0.16, -0.01)   | 1365.66<br>(1077.68, 1758.11) | 1364.89<br>(1077.41, 1757.51) | -0.06<br>(-0.13, 0.01)     | 134.50<br>(87.92, 190.86)  | 133.57<br>(88.16, 190.57)  | -0.70<br>(-2.29, 0.84)     |
| <b>South Sudan</b>        | 265.62<br>(207.36, 337.32)  | 268.04<br>(208.44, 340.66)  | 0.91<br>(0.58, 1.28)      | 1134.38<br>(894.88, 1447.83)  | 1145.76<br>(904.76, 1466.07)  | 1.00<br>(0.51, 1.51)       | 110.97<br>(73.41, 159.46)  | 112.12<br>(73.89, 160.59)  | 1.04<br>(-3.08, 5.17)      |
| <b>Sweden</b>             | 760.63<br>(600.75, 956.11)  | 757.55<br>(598.39, 952.07)  | -0.41<br>(-0.81, -0.02)   | 4330.89<br>(3464.19, 5479.89) | 4344.75<br>(3470.51, 5510.23) | 0.32<br>(-0.14, 0.91)      | 433.01<br>(291.64, 624.78) | 434.57<br>(291.85, 628.07) | 0.36<br>(-1.51, 2.14)      |
| <b>Turkey</b>             | 601.94<br>(472.88, 772.22)  | 601.48<br>(472.59, 771.66)  | -0.08<br>(-0.14, -0.03)   | 2875.69<br>(2253.21, 3640.54) | 2875.01<br>(2252.61, 3640.76) | -0.02<br>(-0.09, 0.04)     | 284.85<br>(187.91, 413.80) | 284.83<br>(188.62, 414.82) | -0.01<br>(-2.43, 2.48)     |

|                                 |                             |                             |                        |                               |                               |                         |                            |                            |                        |
|---------------------------------|-----------------------------|-----------------------------|------------------------|-------------------------------|-------------------------------|-------------------------|----------------------------|----------------------------|------------------------|
| <b>United Kingdom</b>           | 827.15<br>(657.72, 1033.59) | 851.18<br>(675.90, 1073.50) | 2.90<br>(-1.36, 6.98)  | 4485.59<br>(3587.67, 5642.01) | 4501.34<br>(3591.70, 5675.23) | 0.35<br>(-4.98, 6.48)   | 443.77<br>(298.35, 641.82) | 446.79<br>(301.97, 636.94) | 0.68<br>(-4.84, 6.70)  |
| <b>United States of America</b> | 841.68<br>(667.47, 1068.84) | 957.71<br>(771.71, 1170.78) | 13.79<br>(7.68, 19.71) | 4325.43<br>(3473.66, 5461.38) | 5123.29<br>(4268.35, 6170.35) | 18.45<br>(10.01, 27.57) | 422.49<br>(279.70, 604.57) | 500.26<br>(338.92, 704.86) | 18.41<br>(9.89, 27.58) |



**Supplementary table 2. The percent of age-standardized years lived with disability (YLDs) caused by neck pain in all diseases by provinces/regions (1990 and 2019).**

|                                                         | 1990     |         |         |      | 2019     |         |         |      |
|---------------------------------------------------------|----------|---------|---------|------|----------|---------|---------|------|
|                                                         | Mean (%) | LUI (%) | UII (%) | Rank | Mean (%) | LUI (%) | UII (%) | Rank |
| <b>China</b>                                            | 3.71     | 2.87    | 4.81    | 5    | 4.00     | 3.10    | 5.21    | 5    |
| <b>Anhui</b>                                            | 3.67     | 2.86    | 4.81    | 6    | 4.13     | 3.19    | 5.38    | 5    |
| <b>Beijing</b>                                          | 3.73     | 2.88    | 4.86    | 6    | 3.92     | 3.02    | 5.09    | 5    |
| <b>Chongqing</b>                                        | 3.65     | 2.83    | 4.75    | 6    | 3.94     | 3.04    | 5.11    | 5    |
| <b>Fujian</b>                                           | 3.77     | 2.91    | 4.87    | 5    | 4.12     | 3.20    | 5.37    | 5    |
| <b>Gansu</b>                                            | 3.57     | 2.76    | 4.63    | 6    | 3.90     | 3.01    | 5.04    | 6    |
| <b>Guangdong</b>                                        | 3.70     | 2.85    | 4.83    | 5    | 3.90     | 3.02    | 5.05    | 6    |
| <b>Guangxi</b>                                          | 3.68     | 2.85    | 4.82    | 5    | 4.05     | 3.13    | 5.29    | 5    |
| <b>Guizhou</b>                                          | 3.47     | 2.68    | 4.53    | 6    | 3.87     | 2.99    | 5.03    | 5    |
| <b>Hainan</b>                                           | 3.62     | 2.80    | 4.71    | 7    | 3.94     | 3.06    | 5.12    | 6    |
| <b>Hebei</b>                                            | 3.84     | 2.97    | 4.99    | 5    | 3.99     | 3.09    | 5.20    | 6    |
| <b>Heilongjiang</b>                                     | 3.62     | 2.78    | 4.74    | 7    | 3.92     | 3.02    | 5.20    | 7    |
| <b>Henan</b>                                            | 3.80     | 2.93    | 4.95    | 5    | 4.08     | 3.15    | 5.31    | 6    |
| <b>Hong Kong Special Administrative Region of China</b> | 3.82     | 2.98    | 4.93    | 5    | 4.13     | 3.15    | 5.31    | 6    |
| <b>Hubei</b>                                            | 3.69     | 2.82    | 4.79    | 6    | 4.05     | 3.14    | 5.23    | 5    |
| <b>Hunan</b>                                            | 3.58     | 2.77    | 4.65    | 6    | 3.96     | 3.06    | 5.16    | 6    |
| <b>Inner Mongolia</b>                                   | 3.72     | 2.89    | 4.87    | 5    | 3.98     | 3.06    | 5.15    | 6    |
| <b>Jiangsu</b>                                          | 3.71     | 2.86    | 4.81    | 7    | 4.02     | 3.10    | 5.21    | 5    |
| <b>Jiangxi</b>                                          | 3.64     | 2.81    | 4.73    | 5    | 4.09     | 3.15    | 5.33    | 5    |
| <b>Jilin</b>                                            | 3.79     | 2.93    | 4.96    | 6    | 4.13     | 3.18    | 5.39    | 7    |

|                                                     |      |      |      |   |      |      |      |   |
|-----------------------------------------------------|------|------|------|---|------|------|------|---|
| <b>Liaoning</b>                                     | 3.84 | 2.98 | 4.99 | 6 | 4.04 | 3.12 | 5.28 | 7 |
| <b>Macao Special Administrative Region of China</b> | 3.93 | 3.04 | 5.15 | 5 | 4.16 | 3.22 | 5.42 | 6 |
| <b>Ningxia</b>                                      | 3.81 | 2.94 | 4.92 | 6 | 4.00 | 3.09 | 5.21 | 6 |
| <b>Qinghai</b>                                      | 3.86 | 2.99 | 5.02 | 5 | 4.06 | 3.16 | 5.30 | 5 |
| <b>Shaanxi</b>                                      | 3.86 | 2.98 | 4.99 | 5 | 4.19 | 3.24 | 5.45 | 5 |
| <b>Shandong</b>                                     | 3.87 | 2.99 | 5.01 | 7 | 4.12 | 3.19 | 5.35 | 6 |
| <b>Shanghai</b>                                     | 3.62 | 2.79 | 4.73 | 6 | 3.92 | 3.02 | 5.13 | 5 |
| <b>Shanxi</b>                                       | 3.72 | 2.88 | 4.85 | 6 | 4.09 | 3.16 | 5.33 | 6 |
| <b>Sichuan</b>                                      | 3.65 | 2.83 | 4.74 | 7 | 3.86 | 2.98 | 5.03 | 5 |
| <b>Tianjin</b>                                      | 3.89 | 3.00 | 5.06 | 5 | 4.08 | 3.13 | 5.31 | 7 |
| <b>Tibet</b>                                        | 3.55 | 2.70 | 4.61 | 7 | 3.89 | 2.98 | 5.04 | 6 |
| <b>Xinjiang</b>                                     | 3.67 | 2.82 | 4.76 | 5 | 3.95 | 3.06 | 5.13 | 6 |
| <b>Yunnan</b>                                       | 3.56 | 2.74 | 4.63 | 6 | 3.88 | 3.00 | 5.07 | 5 |
| <b>Zhejiang</b>                                     | 3.63 | 2.78 | 4.72 | 8 | 3.96 | 3.05 | 5.14 | 5 |
